# Supplementary material
Source: publisher figshare collection journal article supplement (https://sage.figshare.com/ndownloader/files/13569623)
Supplement: Supplementary file 1 [file 13569623]

## **Supplementary material**

## Literal task

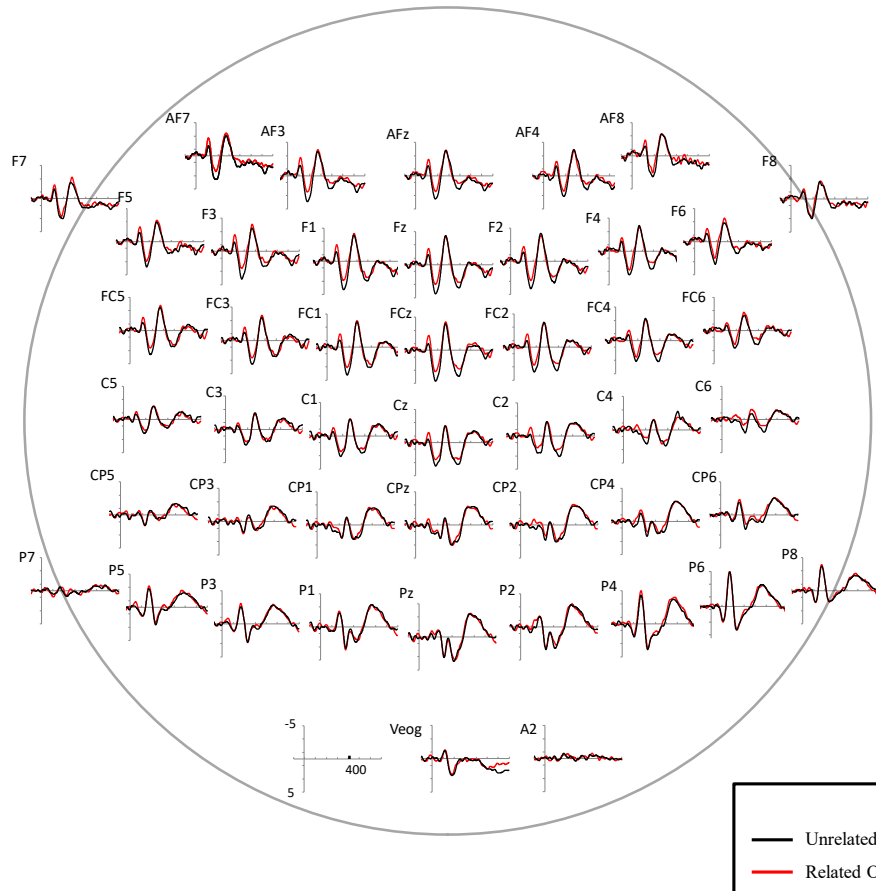

## Categorical task

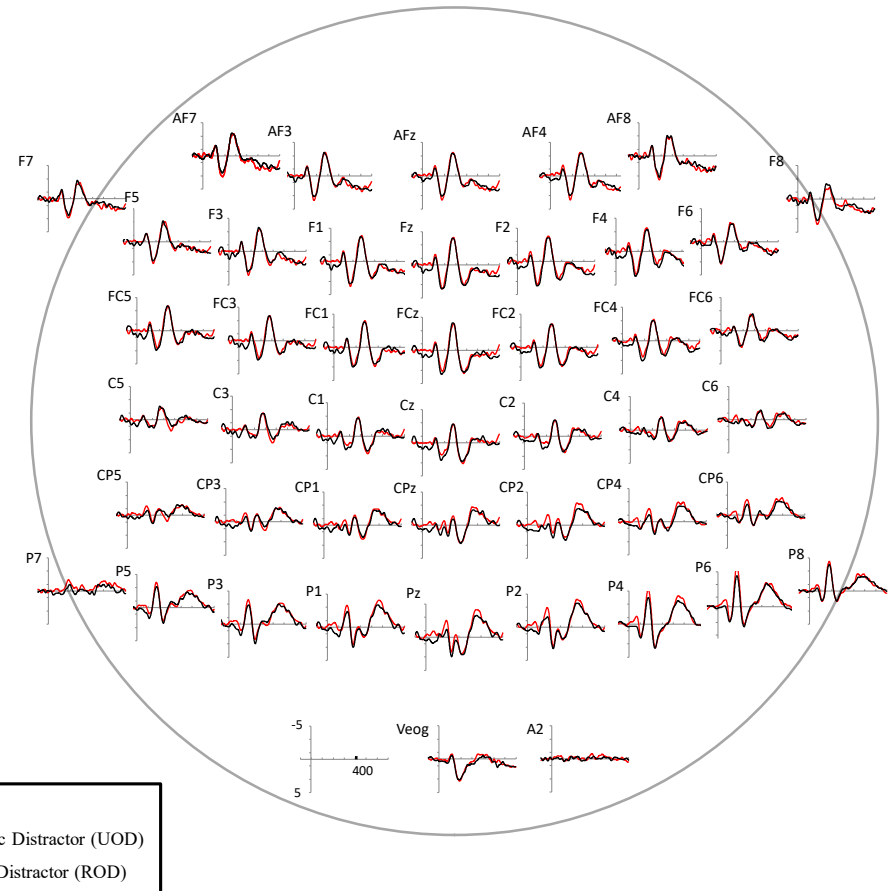

**Figure 1S.** Potentials evoked by parafoveal orthographic distractors (RODs, red line) and their controls (UODs, black line) as a function of the search task (literal versus categorical) when the foveal stimulus was hash symbols.

## Literal task

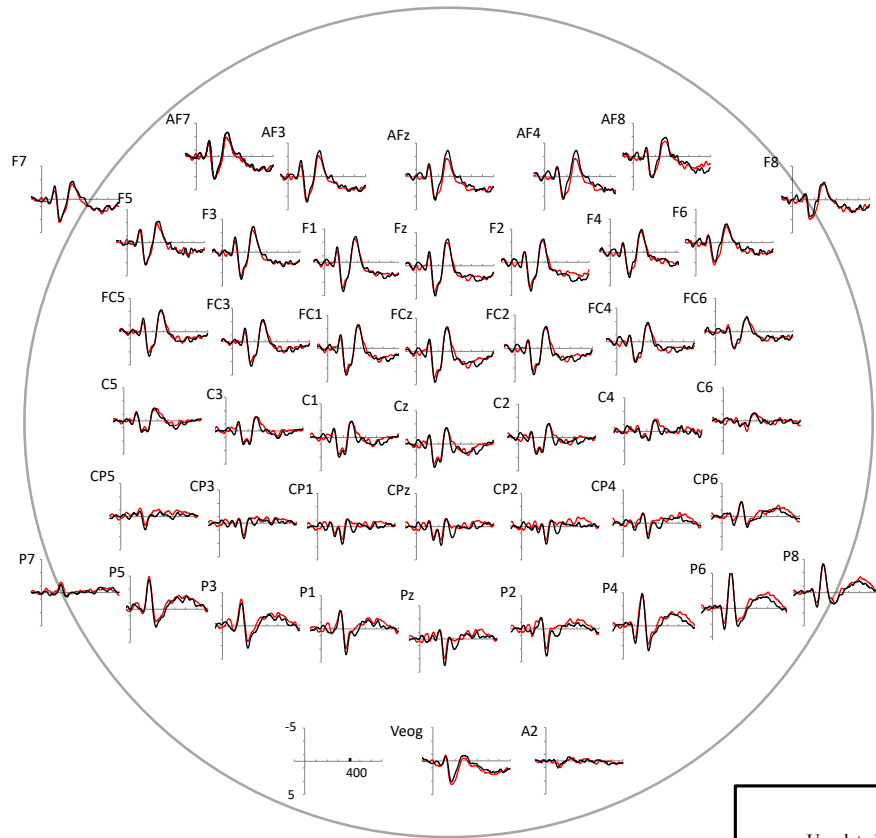

## Categorical task

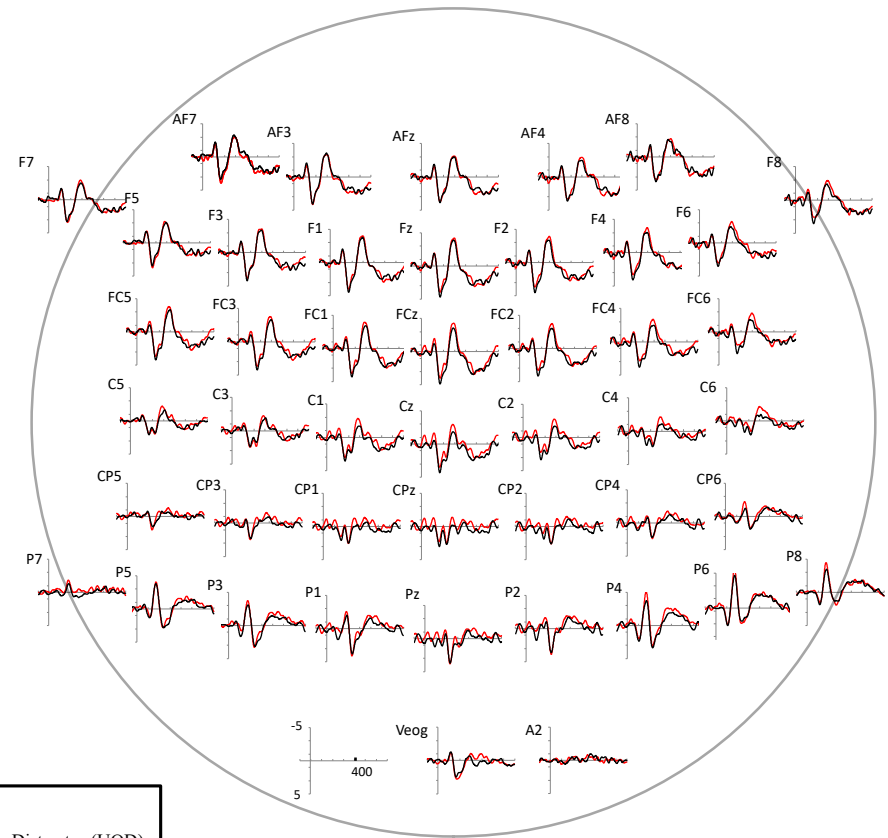

### Legends

- Unrelated Orthographic Distractor (UOD)
- Related Orthographic Distractor (ROD)

**Figure 2S.** Potentials evoked by parafoveal orthographic distractors (RODs, red line) and their controls (UODs, black line) as a function of the search task (literal versus categorical) when the foveal stimulus was a UND.

## Literal task

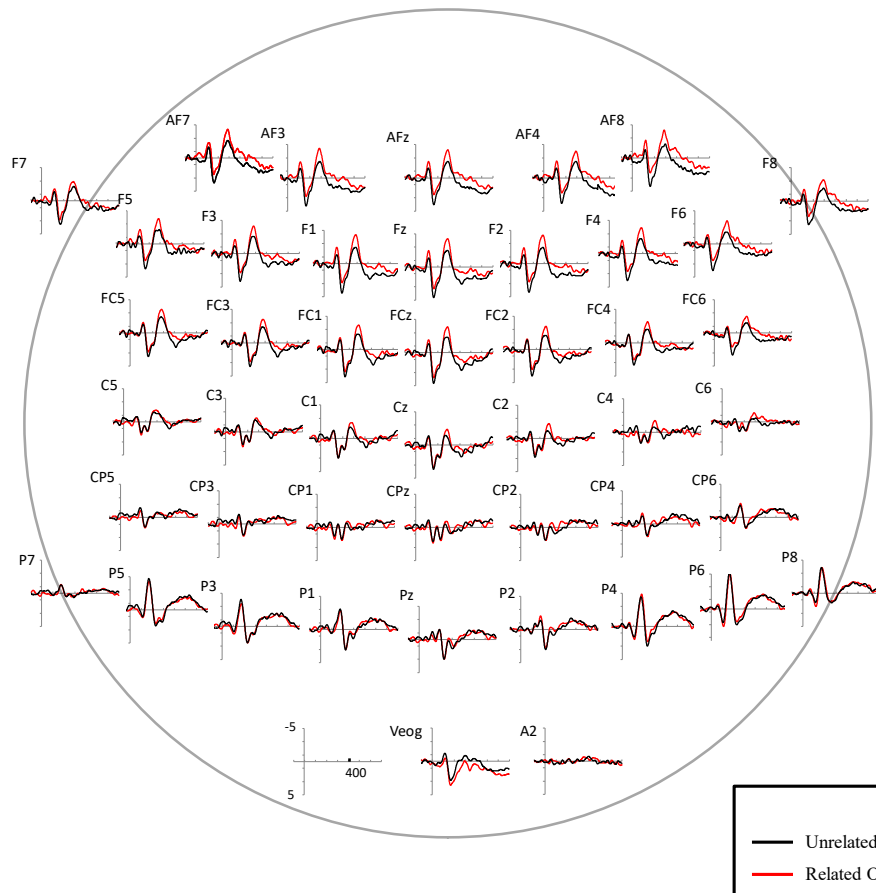

## Categorical task

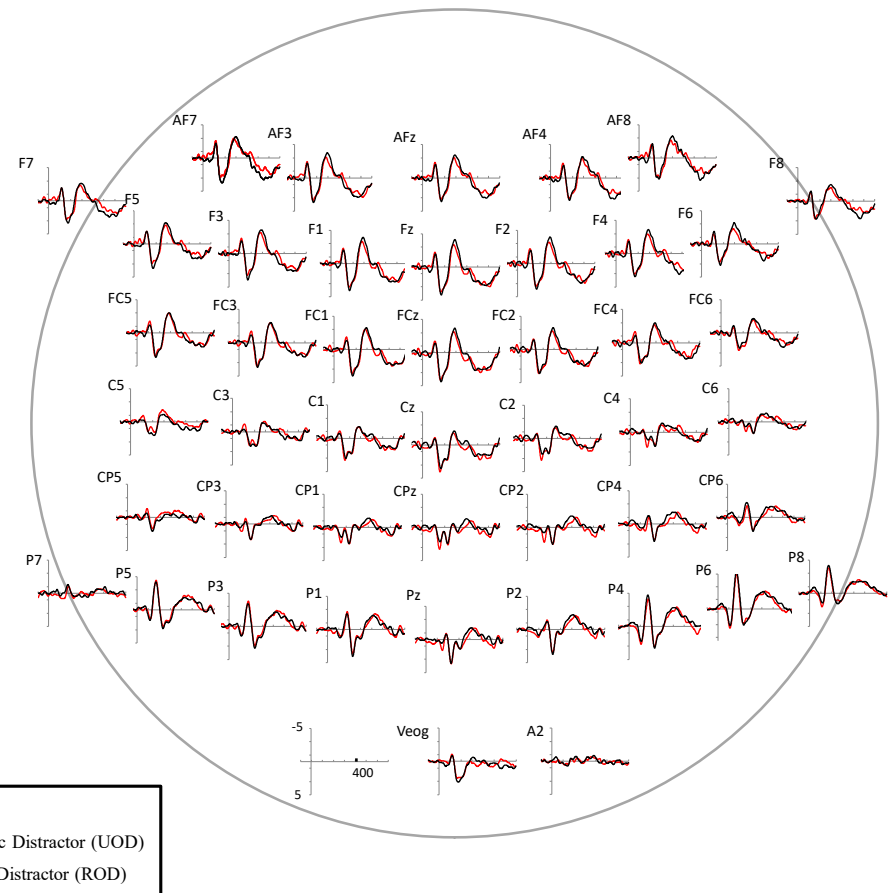

**Figure 3S.** Potentials evoked by parafoveal orthographic distractors (RODs, red line) and their controls (UODs, black line) as a function of the search task (literal versus categorical) when the foveal stimulus was another instance of the same type of distractor as the parafoveal word.

## Literal task

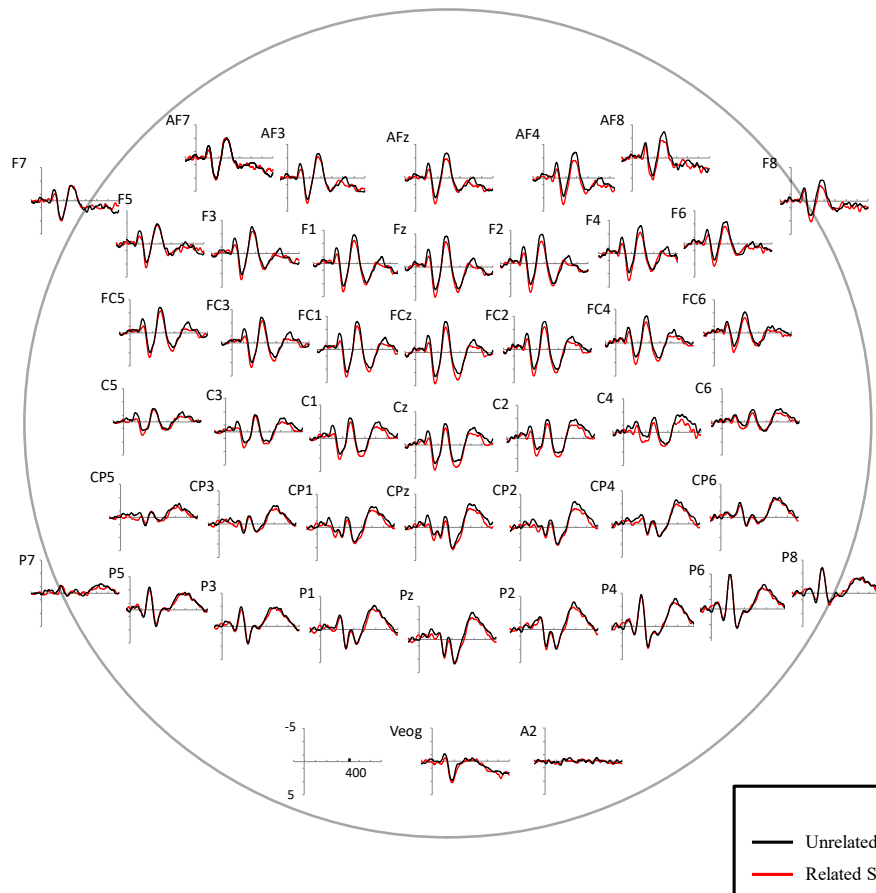

## Categorical task

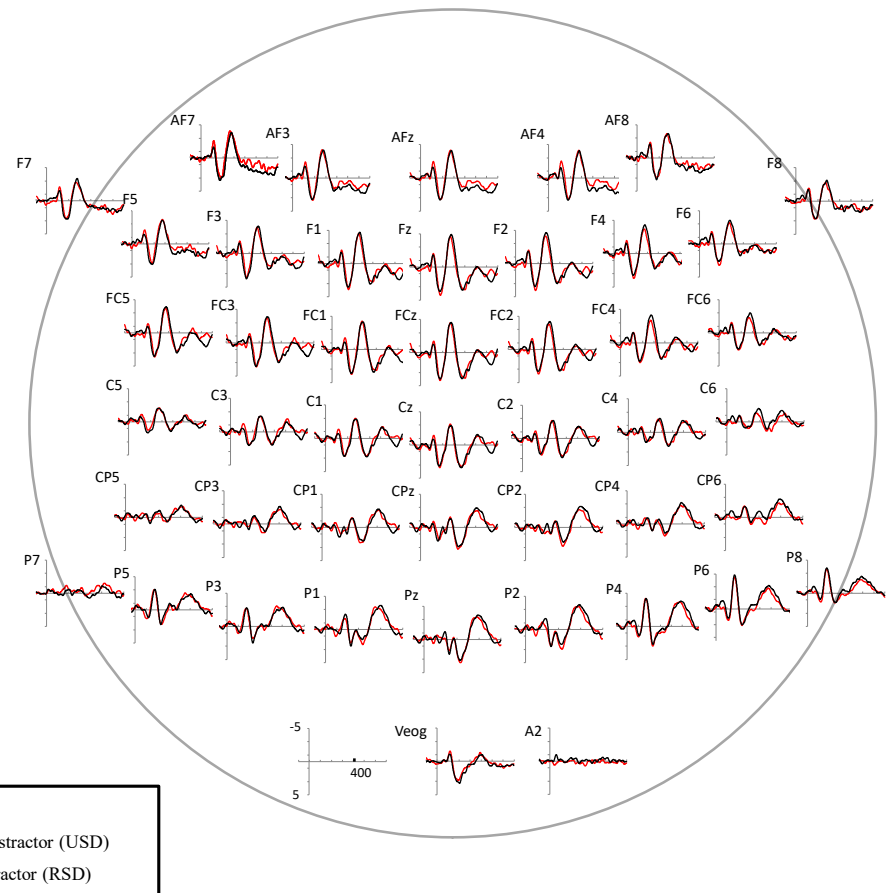

**Figure 4S.** Potentials evoked by parafoveal semantic distractors (RSDs, red line) and their controls (USDs, black line) as a function of the search task (literal versus categorical) when the foveal stimulus was hash symbols.

## Literal task

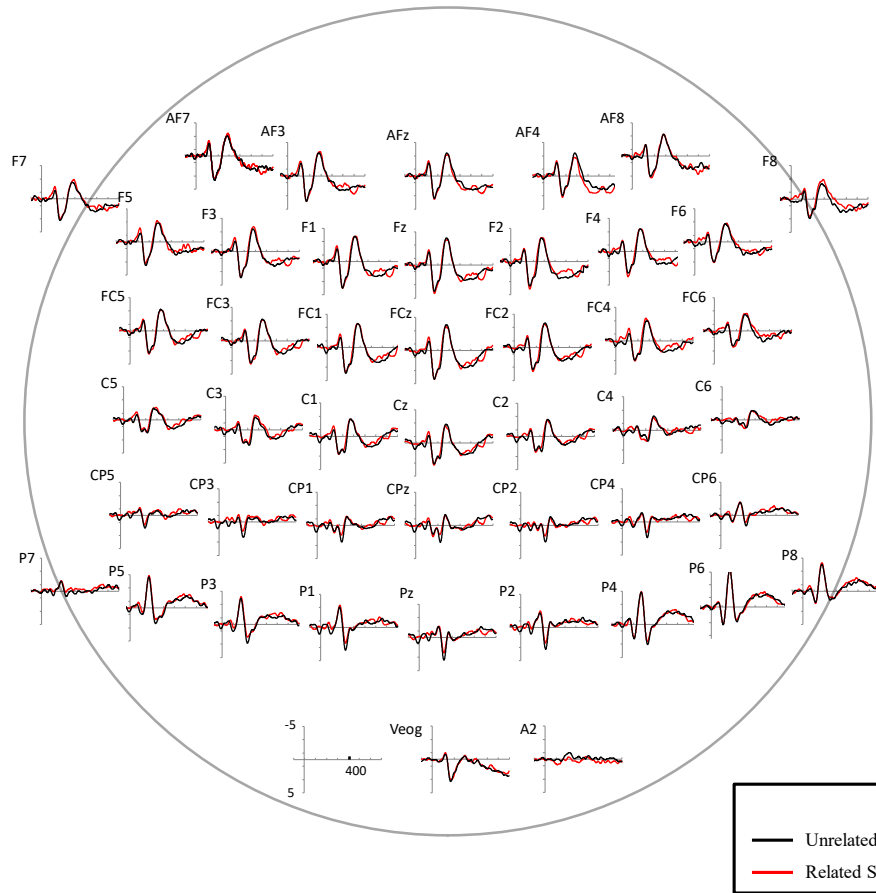

## Categorical task

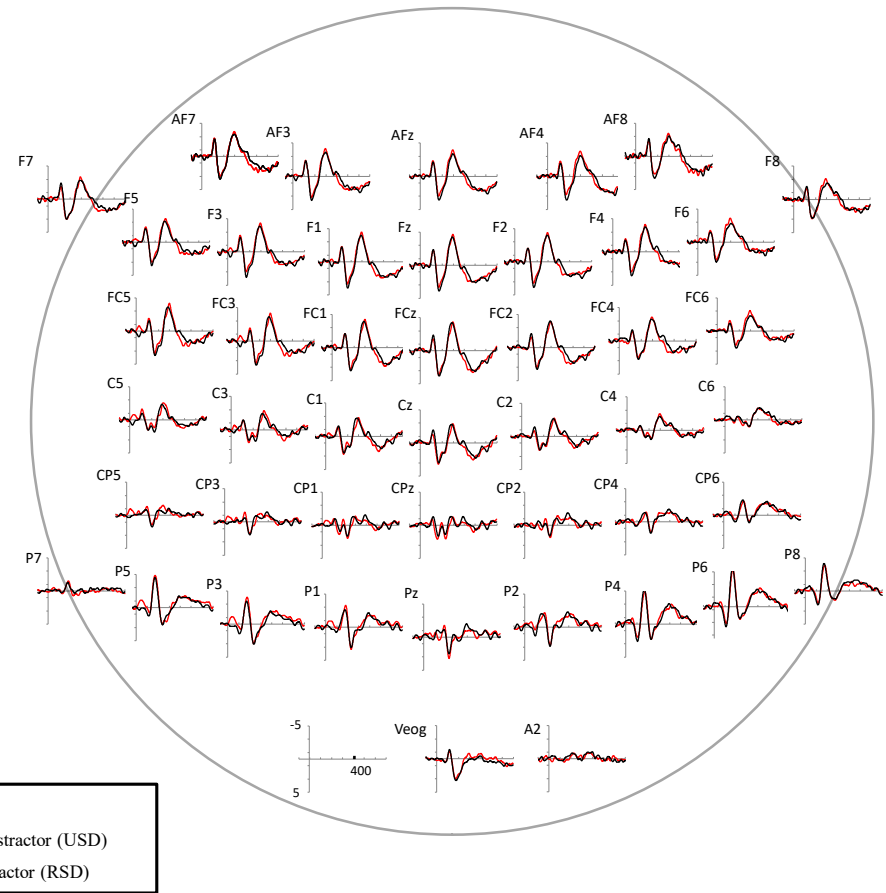

**Figure 5S.** Potentials evoked by parafoveal semantic distractors (RSDs, red line) and their controls (USDs, black line) as a function of the search task (literal versus categorical) when the foveal stimulus was a UND.

## Literal task

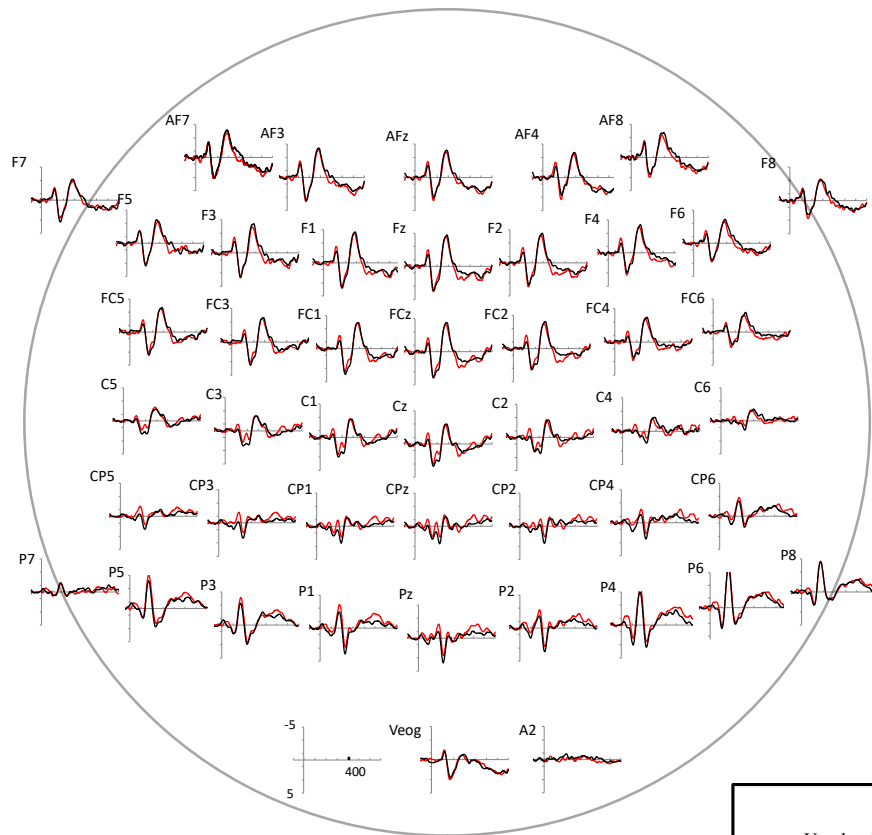

## Categorical task

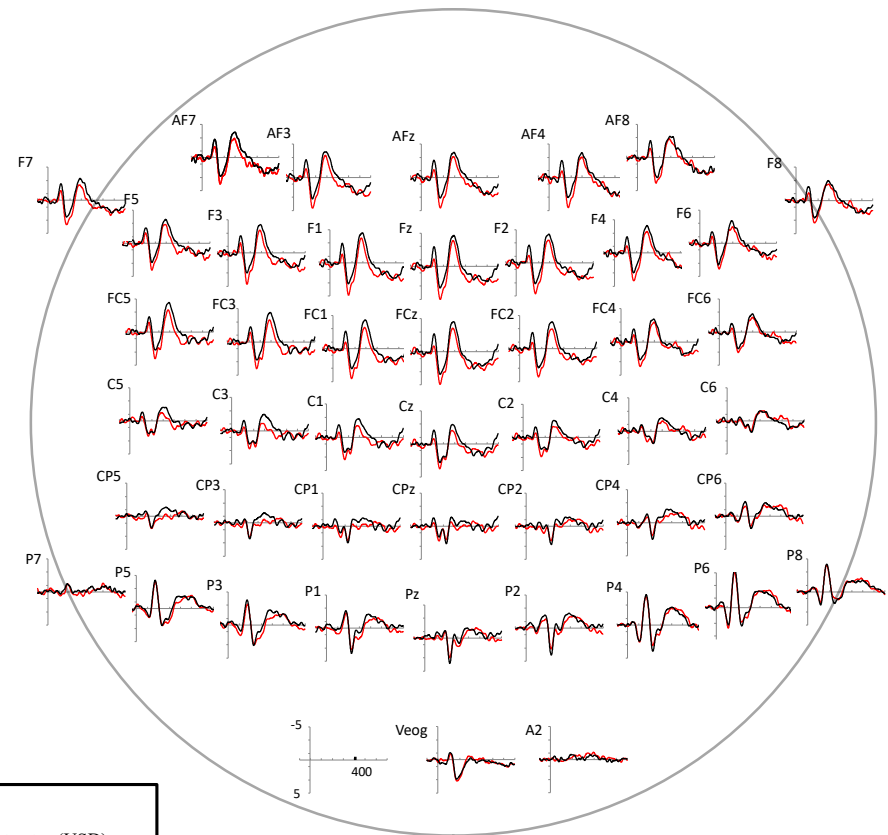

### Legends

- Unrelated Semantic Distractor (USD)
- Related Semantic Distractor (RSD)

**Figure 6S.** Potentials evoked by parafoveal semantic distractors (RSDs, red line) and their controls (USDs, black line) as a function of the search task (literal versus categorical) when the foveal stimulus was another instance of the same type of distractor as the parafoveal word.
